# Supplementary material for: In situ self-assembly of polydopamine inside injectable hydrogels: antibacterial activity and photothermal therapy for superbug-infected wound healing
Source: Royal Society of Chemistry journal article supplement (doi:10.1039/d2bm00310d), 2022-01-01
Supplement: d2bm00310d1.pdf [file d2bm00310d1.pdf]

## Supporting Information

### ***In Situ* Self-Assembly of Polydopamine inside Injectable Hydrogels: Antibacterial Activity and Photothermal Therapy for Superbug-Infected Wound Healing**

Yi Zhu,<sup>†a,c,e</sup> Ling Lin,<sup>†b</sup> Yuntao Xie,<sup>†c</sup> Qinghua Wang,<sup>d</sup> Chenghong Gu,<sup>a</sup> Yu Chen,<sup>a,c,e</sup> Yeping Song,<sup>c</sup> Guohao Han,<sup>c</sup> Weipeng Lu,<sup>\*a,c</sup> and Yanchuan Guo<sup>\*a,c,e</sup>

<sup>a</sup> Key Laboratory of Photochemical conversion and Optoelectronic Material, Technical Institute of Physics and Chemistry, Chinese Academy of Sciences, Beijing 100190, China.

E-mail: luweipeng@mail.ipc.ac.cn; yanchuanguo@mail.ipc.ac.cn

<sup>b</sup> Technical Innovation Center for Utilization of Marine Biological Resources, Third Institute Of Oceanography Ministry of Natural Resources, Xiamen 361005, P.R. China.

<sup>c</sup> Department of Marine Biological Science & Technology, College of Ocean and Earth Sciences of Xiamen University, Xiamen 361002, P.R. China.

<sup>d</sup> Hangzhou Research Institute of Technical Institute of Physics and Chemistry, Chinese Academy of Sciences, Hangzhou 310000, China.

<sup>e</sup> University of Chinese Academy of Sciences, Beijing 100049, China.

<sup>†</sup> Y.Z., L.L. and Y.X contributed equally to this work.

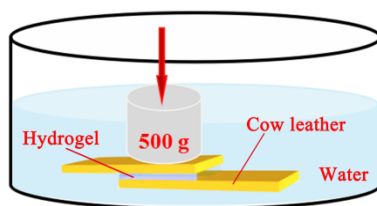

**Figure S1.** Schematic image of preparing specimens underwater.

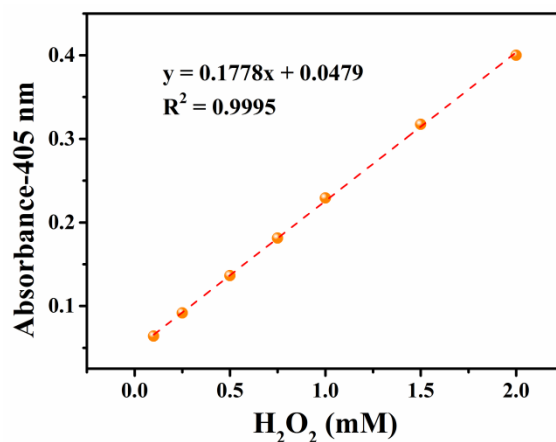

**Figure S2.** The standard curve of the production of ROS.

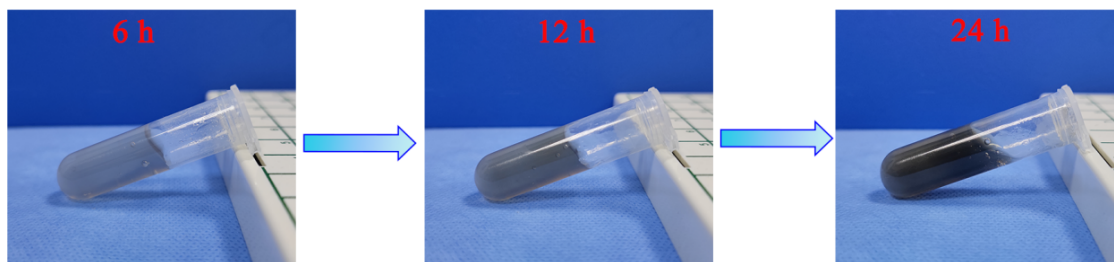

**Figure S3.** Photographs of colour changes of the GCPP-PDA gel along with the continuous self-assembly of dopamine.

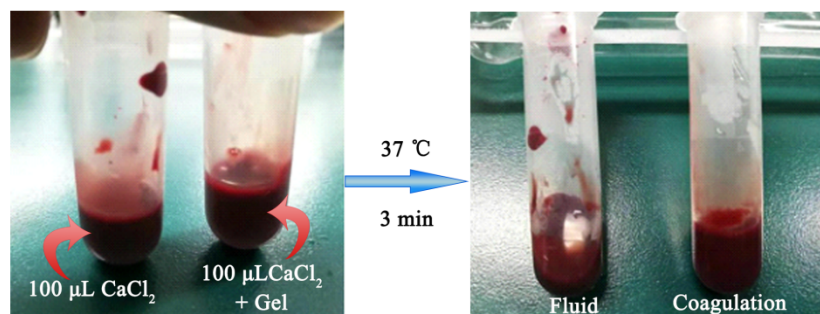

**Figure S4.** Photographs of the coagulation effect of control and GCPP-PDA gel in whole blood.

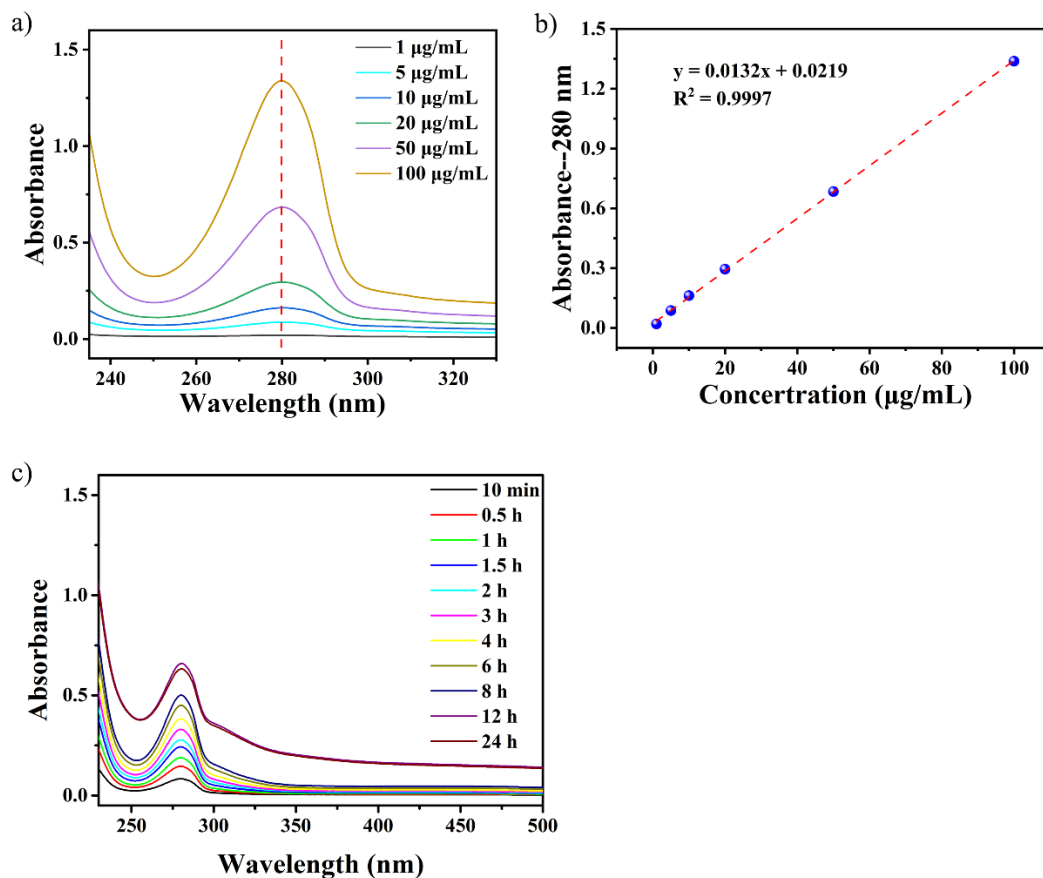

**Figure S5.** a) UV-vis spectra of PDA/PBS solution with different concentration (1  $\mu\text{g}$ ~100  $\mu\text{g}$ ). b) The standard curve of the PDA. c) UV-vis spectra of gel/PBS solution with different extraction times at 37  $^{\circ}\text{C}$ , the volume of PBS was three time of the gel.

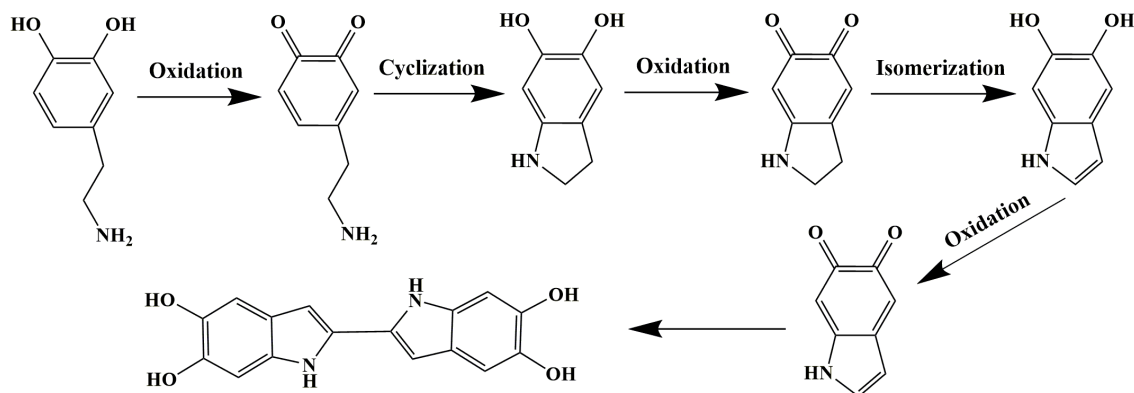

**Figure S6.** The self-assembly of PDA NPs. The steps are presented in the electropolymerization representing the starting reaction for PDA formation.

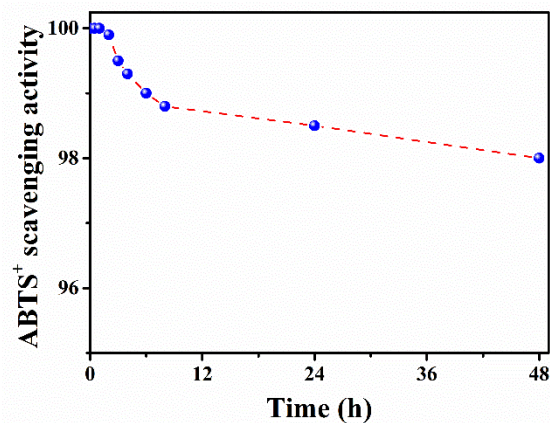

**Figure S7.** The ABTS<sup>+</sup> scavenging activity of the PDA NPs at different assembly time.

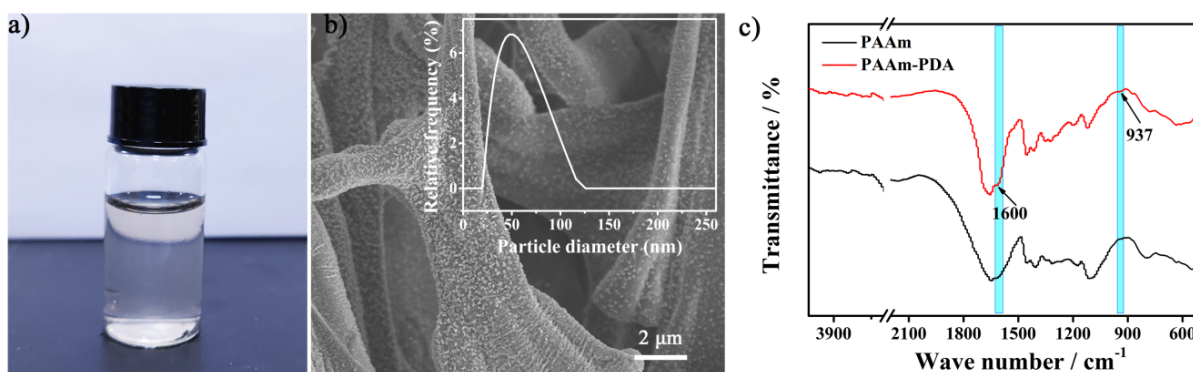

**Figure S8.** a) The stable PAM-PDA solution (positive charged) presents pink. b) The SEM image of the PAM-PDA solution (vacuum freeze drying), and the hydrodynamic diameter of the PDA nanoparticles in the PAM-PDA solution. c) FT-IR test results of PAM and PAM-PDA.

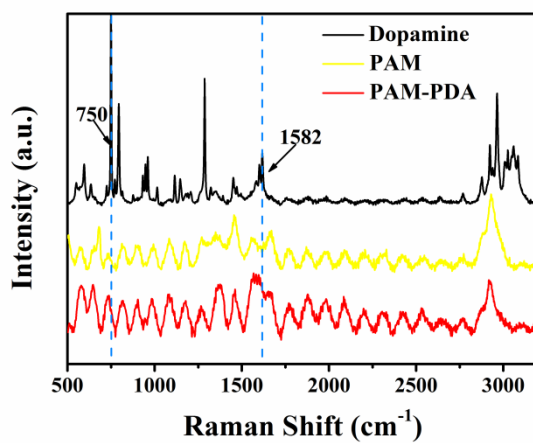

**Figure S9.** Raman spectra of Dopamine, PAM, PAM-PDA.

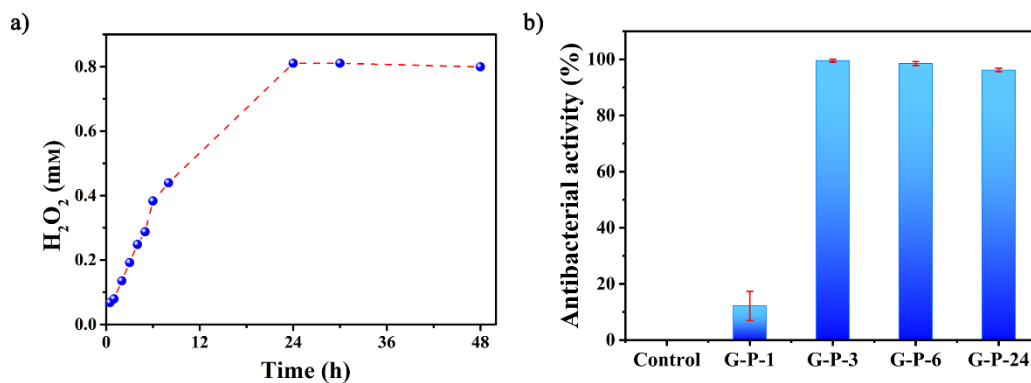

**Figure S10.** a)  $H_2O_2$  generated by GCPP-PDA gel after self-assembly for different time at 37 °C.

b) The antibacterial rates of the GCPP-PDA gel after immersing in PBS for different time.

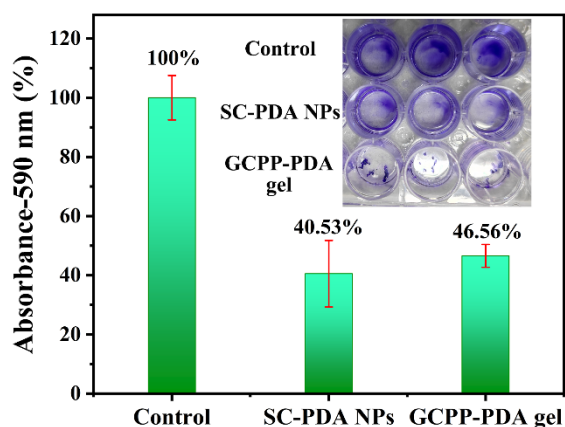

**Figure S11.** Crystal violet staining image and its corresponding absorbance for integrated MRSA biofilm incubated with the SC-PDA NPs and the GCPP-PDA gel. The biofilm without incubation with the sample was used as the control.

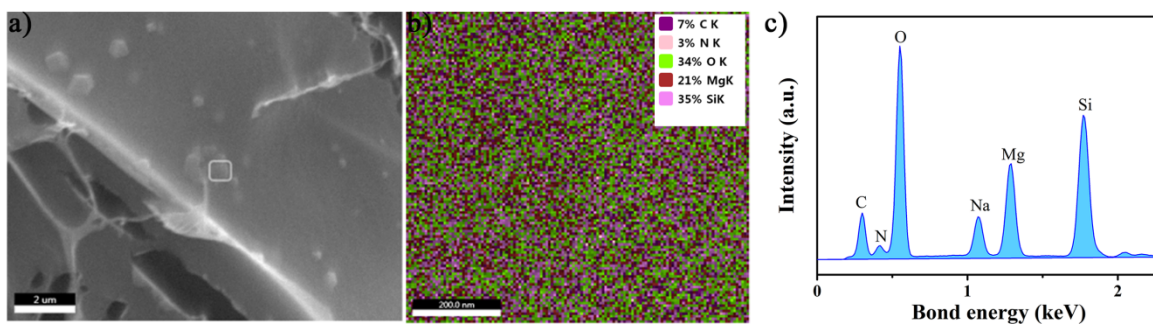

**Figure S11.** EDS of the GCPP-PDA gel.

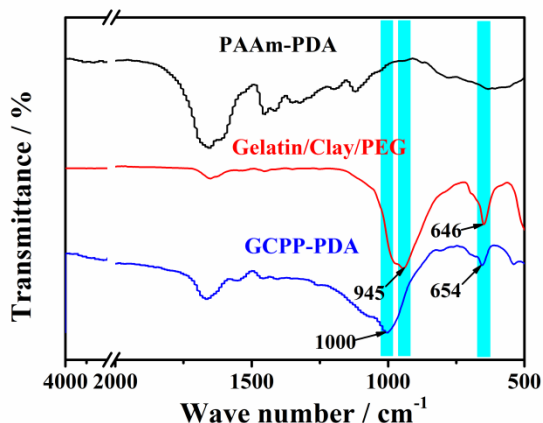

**Figure S12.** The FT-IR spectra of the samples.

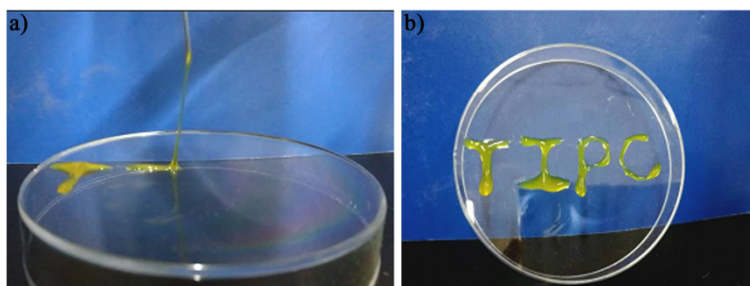

**Figure S13.** Photograph of the injectable GCPP-PDA hydrogel.

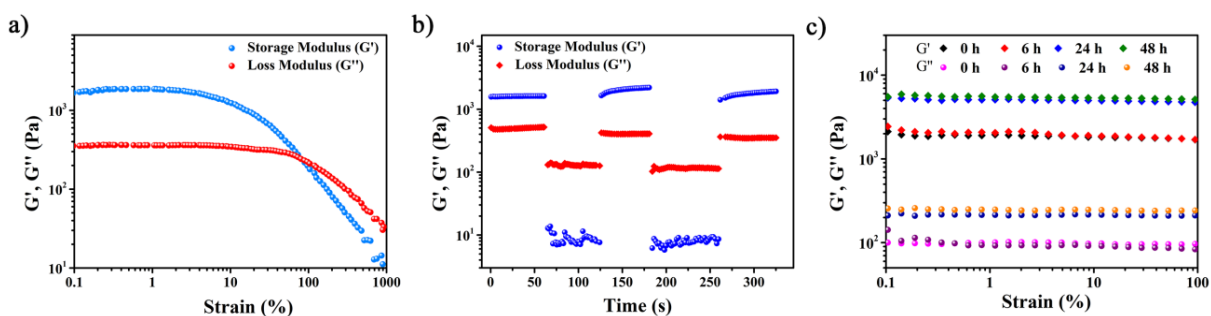

**Figure S14.** Rheological property of the GCPP-PDA gel. a) Strain sweep measurements of  $G'$  (storage modulus) and  $G''$  (loss modulus) of the GCPP-PDA gel. b) Dynamic step-strain measurements of  $G'$  (storage modulus) and  $G''$  (loss modulus) under repeated deformation of 1% strain and 100% strain. c)  $G'$  (storage modulus) and  $G''$  (loss modulus) of the GCPP-PDA gel with different self-assembly time of PDA.

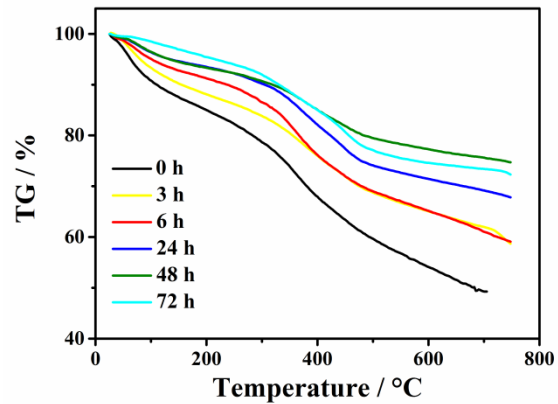

**Figure S15.** TGA curves of a series of the GCPP-PDA gels with different self-assembly time of dopamine.

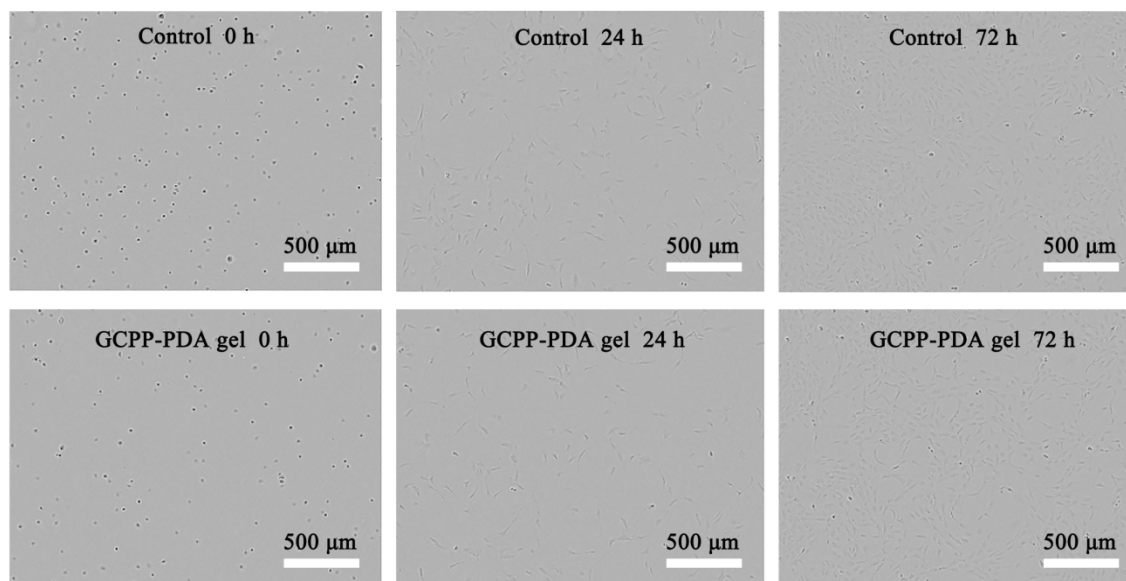

**Figure S16.** The microscopy images of the MC3T3-E1 cells cultured in the presence of unconditioned media and GCPP-PDA gel conditioned medium for 72 hours, respectively.

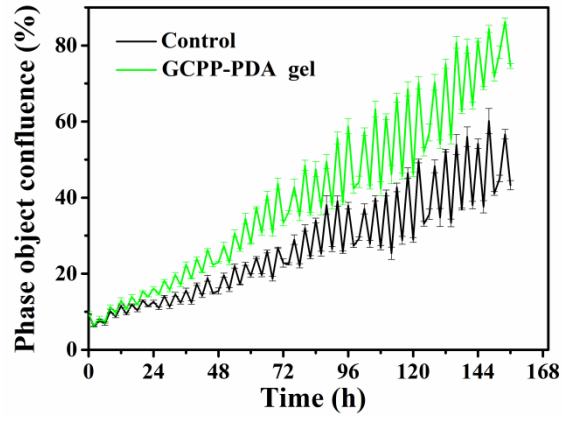

**Figure S17.** The growth curves of the MC3T3-E cells cultured in each group by the the Incucyte Live-Cell Analysis system.



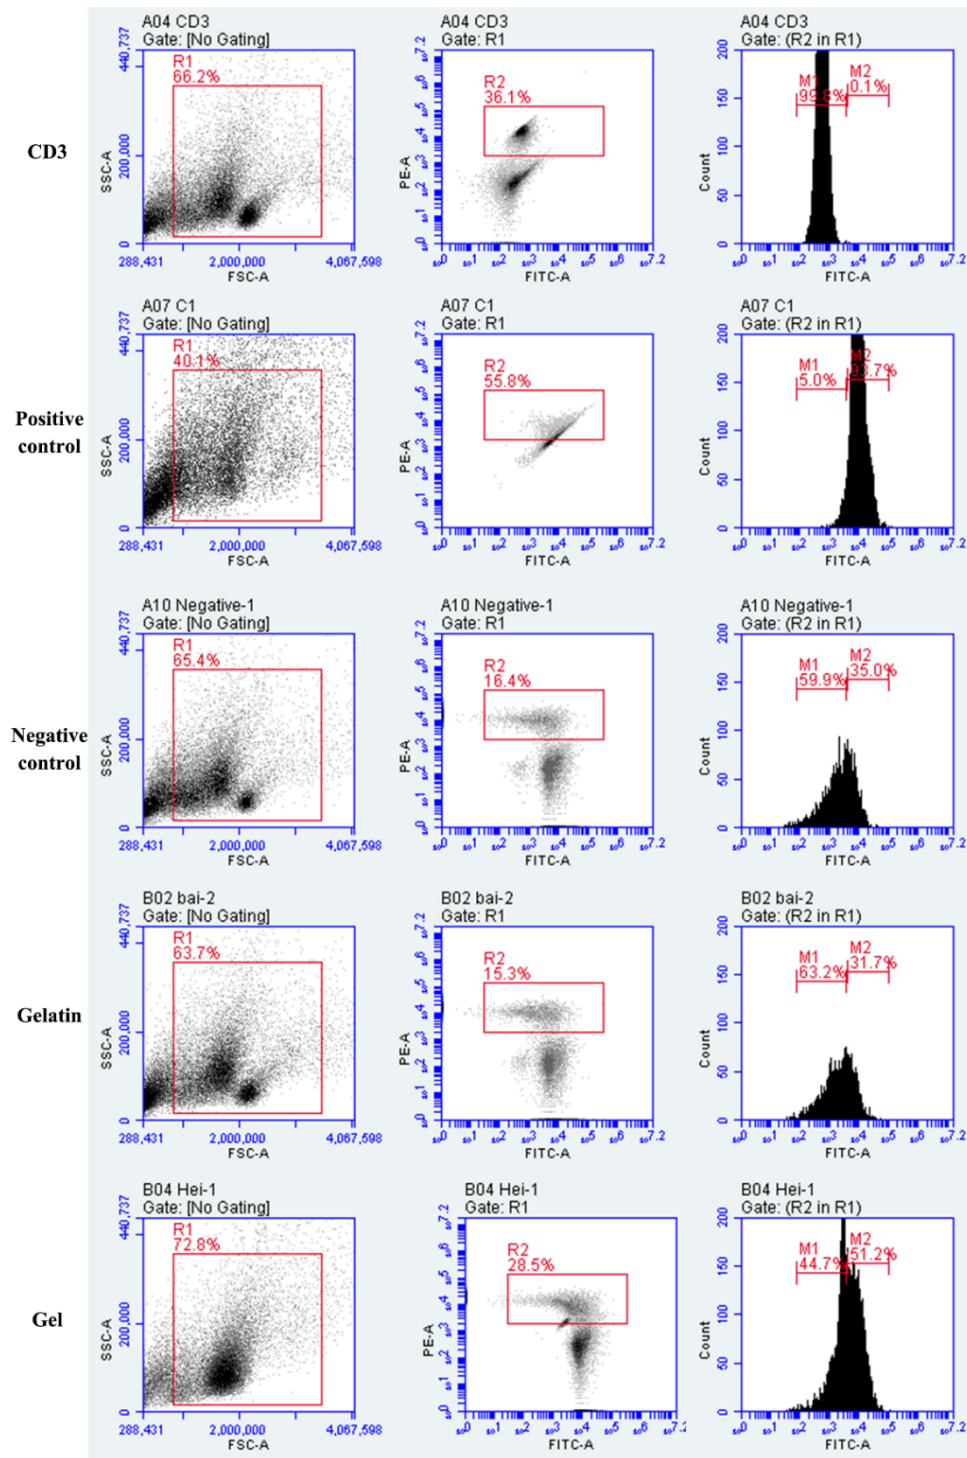

**Figure S18.** The immunogenicity results of the GCPP-PDA gel using CFSE as maker and analysing by flow cytometry (IV ConA as positive group, culture medium as negative, PE anti-mouse CD 3 and PE Rat IgG2b Isotype as antibodies).

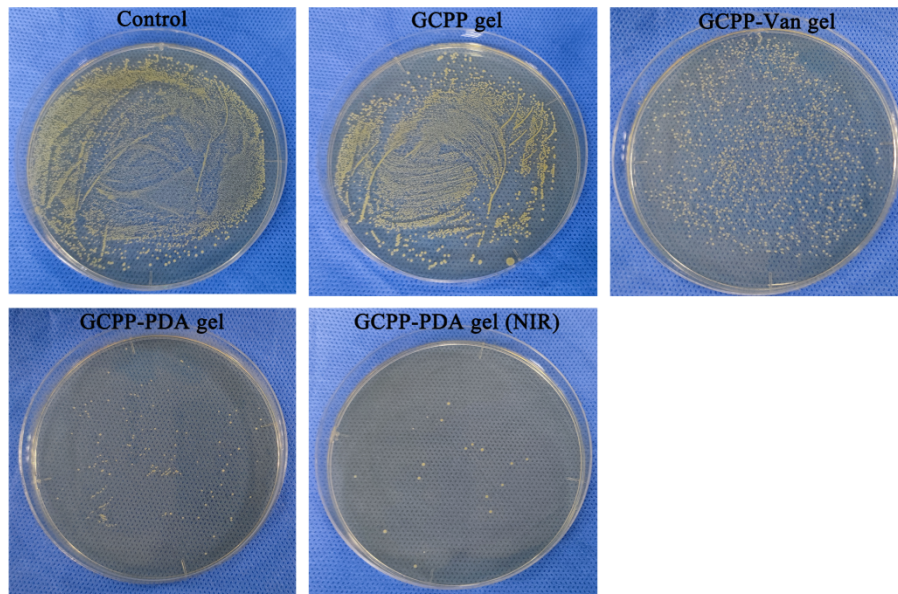

**Figure S19.** Photographs of MRSA colonies after treatments with PBS, GCPP gel, GCPP-Van gel, GCPP-PDA gel, GCPP-PDA gel (NIR) *in vivo*.

**Table S1.** Clotting time of the GCPP-PDA gel and  $\text{Ca}^{2+}$  to whole blood.

| Group | Rabbit blood<br>(natrium citricum) | GCPP-PDA<br>gel | $\text{CaCl}_2$<br>(0.25 M) | Clotting time |
|-------|------------------------------------|-----------------|-----------------------------|---------------|
| 1     | 1 mL                               | 0 mg            | 0 $\mu\text{L}$             | Non           |
| 2     | 1 mL                               | 0 mg            | 100 $\mu\text{L}$           | 365 s         |
| 3     | 1 mL                               | 50 mg           | 0 $\mu\text{L}$             | 780 s         |
| 4     | 1 mL                               | 50 mg           | 100 $\mu\text{L}$           | 180 s         |
